# Supplementary material
Source: PubMed Central journal article supplement (PMC6278819)

1 **Interleukin-1/inhibitory kappa B kinase epsilon-mediated increases in glycolysis**  
2 **augment epithelial effector function and promote house dust mite-induced allergic**  
3 **airways disease**

4 Xi Qian, PhD<sup>a</sup>, Reem Aboushousha, MS<sup>at</sup>, Cheryl van de Wetering, MS<sup>bt</sup>, Shi B. Chia, MS<sup>a</sup>,  
5 Eyal Amiel, PhD<sup>c</sup>, Robert W. Schneider, BS<sup>a</sup>, Jos LJ van der Velden, PhD<sup>a</sup>, Karolyn G.  
6 Lahue, BS<sup>a</sup>, Daisy A. Hoagland, BS<sup>a</sup>, Dylan T. Casey, BS<sup>a</sup>, Nirav Daphtary, MS<sup>d</sup>, Jennifer L.  
7 Ather, PhD<sup>d</sup>, Matthew J. Randall, PhD<sup>d</sup>, Minara Aliyeva, BS<sup>d</sup>, Kendall E. Black, BS<sup>d</sup>, David  
8 G. Chapman, PhD<sup>d,f</sup>, Lennart K. A. Lundblad, PhD<sup>d</sup>, David H. McMillan, PhD<sup>a</sup>, Anne E. Dixon,  
9 MD<sup>d</sup>, Vikas Anathy, PhD<sup>a</sup>, Charles G. Irvin, PhD<sup>d</sup>, Matthew E. Poynter, PhD<sup>d</sup>, Emiel. F.M.  
10 Wouters, MD, PhD<sup>b</sup>, Pamela M. Vacek<sup>e</sup>, Monique Henket, PhD<sup>f</sup>, Florence Schleich, MD<sup>f</sup>,  
11 Renaud Louis, MD, PhD<sup>f</sup>, Albert van der Vliet, PhD<sup>a</sup>, and Yvonne M. W. Janssen-Heininger,  
12 PhD<sup>a\*</sup>

13 <sup>a</sup>Department of Pathology and Laboratory Medicine, University of Vermont College of  
14 Medicine, Burlington, VT

15 <sup>b</sup>Department of Pulmonology, Maastricht University Medical Center, Maastricht, The  
16 Netherlands

17 <sup>c</sup>Department of Medical Laboratory and Radiation, University of Vermont College of Nursing  
18 and Health Sciences, Burlington, VT

19 <sup>d</sup>Department of Medicine, University of Vermont College of Medicine, Burlington, VT

20 <sup>e</sup>Medical Biostatistics Unit, University of Vermont, College of Medicine, Burlington VT

21 <sup>f</sup>Department of Respiratory Medicine, CHU Sart-TilmanB35, Liege, Belgium

22 <sup>f</sup>Woolcock Institute of Medical Research, Sydney Medical School, University of Sydney,  
23 Sydney, Australia

24 <sup>†</sup>These authors contributed equally to this manuscript

28 \* Address correspondence to:

29 Yvonne M.W. Janssen-Heininger, Ph.D.  
30 Department of Pathology,  
31 University of Vermont

32 HSRF Building, Room 216A  
33 Burlington, VT 05405  
34 Phone: 802 656 0995  
35 Fax: 802 656 8892  
36 Email: yvonne.janssen@uvm.edu  
37

38 **List of abbreviations:**

39

40 NECs: Nasal epithelial cells

41 MTE cells: Mouse tracheal epithelial cells

42 WT: Wild-type

43 Rn: Newtonian resistance

44 G: Tissue resistance

45 H: Elastance

46 BAL: Bronchoalveolar lavage

47 ELISA: Enzyme-linked immunosorbent assay

48 qRT-PCR: Quantitative reverse transcription-polymerase chain reaction

49 ECAR: Extracellular acidification rate

50 OCR: Oxygen consumption rate

51 BSA: Bovine serum albumin

52 MAC: Macrophages

53 NEU: Neutrophils

54 EOS: Eosinophils

55 LYM: Lymphocytes

56 KC: Chemokine (C-X-C motif) ligand 1

57 CCL20: Chemokine (C-C motif) ligand 20;

58 TSLP: Thymic stromal lymphopoietin

59 GM-CSF: Granulocyte-macrophage colony-stimulating factor

60 Mct4: Monocarboxylate transporter 4

61 Pfk1: Phosphofructokinase, liver type

62 Hk2: Hexokinase 2

63 Glut: Glucose transporter

64 Pkm2: Pyruvate kinase isoenzyme type M2

65 Ldha: Lactate dehydrogenase A

66 Pgm1: Phosphoglucomutase 1

67 Pdk1: Pyruvate dehydrogenase kinase 1

68 Tpi1: Triosephosphate isomerase 1

69 Eno1: Enolase 1

70 Pgk1: Phosphoglycerate kinase 1

71 Gpi: Glucose-6-phosphate isomerase  
72 Pfkfb3: 6-Phosphofructo-2-Kinase/Fructose-2,6-Biphosphatase 3  
73 Mct1: Monocarboxylate transporter 1  
74  
75  
76  
77  
78  
79  
80  
81  
82  
83  
84  
85  
86  
87  
88  
89  
90  
91  
92  
93  
94  
95  
96  
97  
98  
99  
100  
101  
102  
103  
104  
105  
106  
107  
108  
109  
110  
111  
112  
113  
114  
115  
116  
117  
118  
119  
120  
121  
122

## 123 **Supplemental Materials and Methods**

124

### 125 **Sputum induction**

126           Sputum was induced and processed, as described previously (1-3). Prior to sputum  
127 induction, subjects inhaled 400 µg salbutamol using a metered-dose inhaler (+spacer).  
128 Sputum was induced using an ultrasonic nebulizer (ultra-Neb 2000, Devilbiss; output set at  
129 0.9 ml/min). Subjects inhaled hypertonic saline (NaCl 5%) when FEV1 post salbutamol was  
130  $\geq 65\%$  predicted and isotonic saline (NaCl 0.9%) when FEV1 was  $<65\%$  predicted. The  
131 aerosol was inhaled for three consecutive periods of 5 min. FEV1 was monitored every 5  
132 minutes for safety reasons, and when FEV1 dropped to 80% of the post-bronchodilator  
133 values, the induction procedure was stopped. The whole sputum was weighted and three  
134 volumes of PBS were added. After homogenizing by manual agitation for 30 sec and  
135 centrifugation (800 g) for 10 min at 4°C, the cell pellet and supernatant were separated.  
136 Cells were treated with Sputolysin® 0.1% (Calbiochem, Germany), washed with PBS and  
137 resuspended in 1 ml. Total cell counts, % squamous cells and cell viability (trypan blue  
138 staining) were determined with a manual hemocytometer. Sputum cell differentials were  
139 determined by counting 500 cells non squamous cells on Cytospin samples that were  
140 stained with RAPI-DIFF II stain (Atom Scientific, Manchester, United Kingdom).

141

### 142 **Cell culture and treatments**

143           Primary human nasal epithelial cells (NECs) were isolated from 6 healthy volunteers  
144 and 6 patients with allergic rhinitis and asthma by gentle stroking of the inferior turbinate  
145 surface with a Rhino-Probe curette and cultured as recently described (4) in bronchial  
146 epithelial cell growth medium (Lonza). Atopy was confirmed by positive skin tests and  
147 elevated serum IgE ( $>100$  IU/ml), and asthma was diagnosed by physicians, confirmed by  
148 positive response to bronchodilator ( $\geq 200$  cc and 12% improvement in FEV1 and/or FVC) or  
149 a positive methacholine challenge test (PC20  $< 8$  mg/ml), and had rhinitis with a sinonasal  
150 questionnaire (SNQ) score (5) of greater than 1. Healthy volunteers had no history of rhinitis

151 or asthma, negative skin tests, negative methacholine challenge tests, and a SNQ score of  
152 less than 1. For experiments, NECs were plated on collagen-coated 12-well plates at a  
153 density of  $2 \times 10^5$  cells/well and cultured in a 1:1 mixture of bronchial epithelial cell basic  
154 medium and DMEM-H with SingleQuot supplements (Cambrex), bovine pituitary extract (13  
155 mg/ml), bovine serum albumin (1.5  $\mu$ g/ml), and nystatin (20 units). Following 2 h starvation in  
156 basal medium, NECs were treated with 50ug/ml of HDM D. pteronyssinus; GREER, Lenoir,  
157 NC; 144.9 endotoxin units/mg protein, lot 290903) for 24 h. Primary mouse tracheal  
158 epithelial (MTE) cells were isolated from wild-type (WT) C57BL/6 mice or C57BL/6 mice  
159 lacking the Inhibitor of  $\kappa$ B kinase  $\epsilon$  gene (referred to herein as *Ikkbe*<sup>-/-</sup>) and cultured as  
160 previously described (6, 7). After reaching confluence, MTE cells were incubated for 16 h in  
161 serum-free medium. Cells were stimulated with IL-1 $\alpha$  (10 ng/mL), IL-1 $\beta$  (10 ng/mL), IL-6 (10  
162 ng/mL), IL-13 (5 ng/mL), IL-33 (5 ng/mL), TGF- $\beta$ 1 (5 ng/mL), TNF $\alpha$  (5 ng/mL), IL-17 (20  
163 ng/mL), lipopolysaccharide (LPS, 1  $\mu$ g/mL), or HDM (10  $\mu$ g/mL or 50  $\mu$ g/mL as indicated in  
164 the Figure Legend) for 2 or 24 hr.

165

166 To address the importance of glycolysis or IKK $\epsilon$ /TBK1 in IL-1 $\beta$  induced pro-inflammatory  
167 responses in MTE cells, cells were pre-treated with the hexokinase inhibitor, 2-  
168 Deoxyglucose (2-DG, 10 mM) for 1 h prior to exposure to IL-1 $\beta$  for 24 h. Alternatively, cells  
169 were incubated with the lactate dehydrogenase A inhibitor, oxamate (10 mM), or the  
170 IKK $\epsilon$ /TBK1 inhibitor, Amlexanox (10-100  $\mu$ M, Tocris) overnight, followed by the stimulation  
171 IL-1 $\beta$  (10 ng/mL) for 24 h. To determine whether IL-1 $\beta$ -induced glycolysis or IKK $\epsilon$ /TBK1  
172 augmented the subsequent response to HDM, in select experiments, cells were washed post  
173 inhibitor/IL-1 $\beta$  treatment, incubated with DMEM/F12 medium for 2 h before stimulation with  
174 HDM for an additional 2 hours according the schematic illustrations shown in the relevant  
175 figures. To address the role of glycolysis in IL-1 $\alpha$ -dependent pro-inflammatory responses,  
176 MTE cells were pre-incubated with 10 mM 2-DG for 1 h or 10 mM oxamate for 16 h prior to  
177 exposure to IL-1 $\alpha$  for 24 h and subsequent assessment of pro-inflammatory mediators in

178 supernatants. Note that absolute values of KC vary between studies due to freezing of some  
179 supernatants.

## 180 **Mouse studies**

181 Age-matched, 8- to 12-week-old mice were used (The Jackson Laboratory, Bar  
182 Harbor, ME) for all experiments. Wild-type (WT, C57BL6/NJ), *Rag*<sup>-/-</sup> (C57BL6/J), or *Ikkbe*<sup>-/-</sup>  
183 (C57BL6/J) mice along with their strain-matched controls were sensitized (Days 1 and 8),  
184 challenged (Days 15-19), and rechallenged (Days 29, 32, 36, and 39) with HDM extract  
185 containing 10 µg protein (GREER, Lenoir, NC; 144.9 endotoxin units/mg protein, lot 290903)  
186 as shown in Figure 1A. Mice were euthanized and analyzed at different end points at Days 1  
187 (2 h post HDM sensitization), 2 (24 h post HDM sensitization), 20 (24 h post the last  
188 challenge of 5 consecutive HDM challenge), 29 (2 h post the first HDM re-challenge), 30 (24  
189 h post the first HDM rechallenge), and/or 40 (24 h post the last HDM rechallenge). The  
190 control group was subjected to saline as a vehicle control. In the *Ldha* siRNA knockdown  
191 studies, WT C57BL6/NJ mice were anesthetized with isoflurane and subjected to 10 mg/kg  
192 of siRNA targeting *Ldha* or scrambled small interfering siRNA oropharyngeally on days 26,  
193 30, 33, and 37 post-initiation of the HDM exposure regimen, and mice were harvested in day  
194 40 (24h post the last HDM re-challenge). In the IL-1 neutralization experiments, WT  
195 C57BL6/J mice were challenged with HDM on days 15, 16, 17, and 18, and analyzed on day  
196 20. Mice received 5 mg/kg of IL-1 Trap (Regeneron Pharmaceuticals, Tarrytown, NY) on  
197 Day 14 and Day 17 by i.p. injections, based upon a previous study demonstrating that this  
198 dosing regimen of IL-1 Trap attenuated cardiac remodeling after experimental acute  
199 myocardial infarction in mice (8). In select experiments, 1 µg of IL-1β (R&D Systems,  
200 resuspended in 0.1% BSA in PBS) was directly administered intranasally.

## 201 **Assessment of airway hyperresponsiveness**

202 Following completion of the HDM protocol, mice were anesthetized with  
203 intraperitoneal pentobarbital sodium (90 mg/kg), tracheotomized, and mechanically  
204 ventilated at 200 breaths/min. Mice were subjected to increasing doses of methacholine (0,  
205 12.5, 25, 50, and 100 mg/mL) administered via ultrasonic nebulization, and respiratory

206 mechanics were assessed using a forced oscillation technique on a computer-controlled  
207 small animal ventilator (SCIREQ, QC, Canada), as previously described (9, 10). Parameters  
208 of Newtonian resistance ( $R_n$ ), tissue resistance (G) and elastance (H) were calculated and  
209 quantified by averaging the three highest measurements obtained at each incremental  
210 methacholine dose for each mouse (9, 10).

211 **Assessment of mucus metaplasia:** Airway mucus was stained via Periodic acid Schiff  
212 (PAS) and the staining intensity was evaluated by scoring of slides by two independent  
213 blinded investigators(11). Levels of MUC5AC were evaluated in lung tissue or BAL via  
214 ELISA (My Biosource).

#### 215 **Bronchoalveolar lavage fluid processing**

216 After mice were euthanized, bronchoalveolar lavage (BAL) was performed using 1 ml  
217 PBS. BAL was collected and total cell counts were determined using an Advia 120  
218 Automated Hematology Analyzer. BAL was spun down at 1200xg for 5 min. Cells were  
219 transferred to slides using a cytopsin, fixed in methanol and stained using the Hema3 kit  
220 (Fisher Scientific, Kalamazoo, MI) and analyzed by counting a minimum of 300 cells per  
221 mouse, as described elsewhere (11). Supernatants were flash frozen in liquid nitrogen and  
222 stored at -80 °C until analysis.

#### 223 **Enzyme-Linked Immunosorbent Assay (ELISA)**

224 IL-1 $\alpha$ , IL-1 $\beta$ , IL-6, TNF $\alpha$ , IL-17, GM-CSF, and CCL20 were detected by ELISA in lung  
225 homogenates (normalized for protein) or supernatants from cell culture, according to the  
226 manufacturer's instructions (R&D Systems, Minneapolis, MN).

#### 227 **Quantitative Reverse Transcription-Polymerase Chain Reaction (qRT-PCR)**

228 RNA was extracted using miRNeasy columns (Qiagen, Valencia, CA) as directed by  
229 the manufacturer. One  $\mu$ g of RNA was reverse transcribed to cDNA for gene analysis using  
230 SYBR Green (Bio-Rad; Hercules, CA, USA) to assess expression of *Mct4*, monocarboxylate  
231 transporter 4; *Pfkl*, phosphofructokinase, liver type; *Hk2*, Hexokinase 2; *Glut1*, glucose  
232 transporter 1; *Glut3*, glucose transporter 3; *Pkm2*, pyruvate kinase isoenzyme type M2;  
233 *Ldha*, lactate dehydrogenase A; *Pgm1*, phosphoglucomutase 1; *Pdk1*, pyruvate

234 dehydrogenase kinase 1; *Tpi1*, triosephosphate isomerase 1; *Eno1*, enolase 1; *Pgk1*,  
235 phosphoglycerate kinase 1; *Gpi*, glucose-6-phosphate isomerase; *Pfkfb3*, 6-Phosphofructo-  
236 2-Kinase/Fructose-2,6-Biphosphatase 3; *Mct1*, monocarboxylate transporter 1; *Glut2*,  
237 glucose transporter 2; and *Ikbke*, inhibitory kappa B kinase  $\epsilon$ . Expression values were  
238 normalized to the house keeping gene cyclophilin. Detailed primer sequences are provided  
239 in the online supplement, Table E3.

## 240 **Bioenergetics**

241 The extracellular acidification rate (ECAR) was measured using the Seahorse  
242 Extracellular Flux (XF24) Analyzer (Agilent Technologies). MTE cells were seeded onto 24-  
243 well seahorse plate at a density of 50,000 cells per well and cultured with or without 10  
244 ng/mL IL-1 $\beta$  for 24 h. Cells were then washed 3 times with Seahorse stress test glycolysis  
245 assay media (DMEM without glucose, L-glutamine, phenol red, sodium pyruvate, and  
246 sodium bicarbonate [Sigma-Aldrich] supplemented with 1.85 g/l sodium chloride, 2mM L-  
247 glutamine, and 3 mg/l phenol red [GlycoStress Assay], pH 7.35). The plate was incubated in  
248 a 37°C non-CO<sub>2</sub> incubator for 1 h. The plate was then transferred to the Seahorse XF24  
249 Analyzer for analysis and subjected to ECAR measurements followed by successive  
250 treatments with glucose (10 mM), oligomycin (0.25  $\mu$ M), and 2-deoxyglucose (100 mM).

## 251 **Glucose measurements**

252 Glucose consumption and uptake in MTE cells were measured 24 h post stimulation with IL-  
253 1 $\beta$ , by measuring glucose concentration in the cell culture supernatants (Eton Bioscience)  
254 and cellular incorporation of fluorescent glucose analog [2-NBDG, 2-(N-(7-Nitrobenz-2-oxa-  
255 1,3-diazol-4-yl)Amino)-2-Deoxyglucose, Life technology] using a plate reader (Biotek,  
256 Winooski, VT).

## 257 **Immunohistochemistry**

258 Fixed sections were prepared for immunostaining by deparaffinizing with xylene and  
259 rehydrating through a series of ethanols. For antigen retrieval, slides were heated for 20 min  
260 in 95°C citrate buffer (pH 6.0), then rinsed in dis tilled water. Sections were then blocked for 1  
261 h in blocking serum as per manufacturer's instructions (Vectastain Alkaline Phosphatase



262 Universal, Vector). Slides were then washed in TBS with 0.1% TWEEN-20 3x5 min, followed  
263 by incubation with primary antibody for lactate dehydrogenase A overnight at 4°C. Sections  
264 were washed again and incubated with a biotinylated universal secondary antibody  
265 (Vectastain Alkaline Phosphatase Universal, Vector) for 30 min at room temperature. Slides  
266 were washed and incubated with the Vectastain ABC-AP reagent (prepared as per  
267 manufacturer's instructions) for 30 min at room temperature. Sections were then incubated  
268 with Vector Red/Vector Blue Alkaline Phosphatase Substrate Kit I (Vector) for 10 min at  
269 room temperature, rinsed with tap water, and counterstained with Mayer's Hemotoxylin.

## 270 **Immunofluorescence**

271           Following euthanization, left lobes were fixed with 4% paraformaldehyde, stored at  
272 4°C overnight for fixation of the tissue, mounted in paraffin, and 5 µm sections were affixed  
273 to glass microscope slides for histopathology as previously described (12). For antigen  
274 retrieval, slides were heated for 20 min in 95°C citrate buffer (pH 6.0) with 0.05% TWEEN-20  
275 then rinsed in distilled water. Sections were then blocked for 1 h in 1% bovine serum  
276 albumin (BSA) in PBS, followed by incubation with primary antibody for IKBKE (Cell  
277 Signaling Technology, Danvers, MA) at 1:100, overnight at 4°C. Slides were then washed  
278 3x5min in PBS, incubated with Alexafluor 647, and counterstained with DAPI in PBS for  
279 nuclear localization. Sections were imaged using a Zeiss 510-META confocal laser scanning  
280 microscope.

281

## 282 **Lactate assay**

283           The concentration of lactate in the medium, BAL, and lung homogenates was  
284 assessed with a Lactate Assay Kit (Eton Bioscience) according to each manufacturer's  
285 recommendations.

286

287

288

289

290

291

292

293  
294  
295  
296  
297  
298  
299  
300  
301

302 **Figure legend**

303 **Figure E1:** Airway inflammation in mice exposed to house dust mite (HDM). **(A)** Total and  
304 **(B)** differential cell counts in bronchoalveolar lavage (BAL) in response to saline or HDM,  
305 (see schematic in **Figure 1A**). Data are expressed as means ( $\pm$  SEM) ( $n = 5$  mice per  
306 group). \* $P < 0.05$  (Student's  $t$  test) compared with saline controls.

307 **Figure E2:** Assessment of levels of IL-1 $\alpha$  and IL-1 $\beta$  in lung tissues from mice subjected to  
308 vehicle control or IL1 Trap. Mice were challenged with HDM on days 15, 16, 17, and 18, and  
309 received 5 mg/kg of IL-1 Trap or vehicle on days 14 and 17 intraperitoneally. Levels of IL-1 $\alpha$   
310 and IL-1 $\beta$  in lung tissues homogenates were evaluated on day 20 via ELISA. \* $P < 0.05$   
311 compared to saline control, †  $P < 0.05$  compared to HDM/Veh group (ANOVA).

312 **Figure E3:** Evaluation of pro-inflammatory mediators and airway inflammation in mice  
313 exposed to interleukin (IL)-1 $\beta$ . **A:** Lung tissue levels of KC, TSLP, CCL20 and GM-CSF  
314 following intranasal administration of IL-1 $\beta$  or vehicle. Total **(B)** and differential cell counts  
315 **(C)** in BAL from the mice at multiple time points post intranasal administration of vehicle or  
316 IL-1 $\beta$ . Data are expressed as means ( $\pm$  SEM) ( $n = 5$  mice per group). \* $P < 0.05$  (ANOVA)  
317 compared with Vehicle controls.

318 **Figure E4: A:** Assessment of viability following exposure to MTE cells to oxamate or 2-  
319 deoxyglucose. Epithelial cells were exposed to IL-1 $\beta$  in the presence or absence of  
320 inhibitors. Cell survival was evaluated via crystal violet staining of cells. Results were  
321 expressed as % survival compared to untreated control cultures. **B:** Impact of 2-DG or  
322 oxamate on IL1 $\alpha$ -mediated increases in lactate and the indicated pro-inflammatory  
323 mediators measured 24 hr post exposure to IL-1 $\alpha$ . \* $P < 0.05$  (ANOVA) compared to the  
324 sham group. † $P < 0.05$  compared to the IL-1 $\beta$  treated Vehicle group (ANOVA).

325 **Figure E5: A:** Quantification of Western blots shown in Figure 8A. Data reflects  $n=3$  healthy  
326 subjects and  $n=3$  asthmatics. Data were normalized to  $\beta$ -actin and are expressed as fold  
327 change from healthy sham controls \* $P < 0.05$  compared to the sham healthy group. † $P <$   
328  $0.05$  compared to HDM healthy group (ANOVA). **B:** Sub-analysis of sputum lactate and IL-  
329 1 $\beta$  in asthmatics with normal neutrophils (cut off  $\leq 61\%$ ) or high neutrophils (cut off  $> 61\%$ ),

330 controlled (ACQ  $\leq$  1.5) or uncontrolled asthma (ACQ  $>$  1.5). p-values (ANOVA or Wilcoxon  
331 rank sum test) are provided in each of the figures.

332

333

334

## 335 **References**

- 336 1. Manise M, Holtappels G, Van Crombruggen K, Schleich F, Bachert C, Louis R. Sputum IgE and  
337 cytokines in asthma: relationship with sputum cellular profile. *PloS one*. 2013;8(3):e58388.
- 338 2. Delvaux M, Henket M, Lau L, Kange P, Bartsch P, Djukanovic R, et al. Nebulised salbutamol  
339 administered during sputum induction improves bronchoprotection in patients with asthma. *Thorax*.  
340 2004;59(2):111-5.
- 341 3. Maes T, Cobos FA, Schleich F, Sorbello V, Henket M, De Preter K, et al. Asthma inflammatory  
342 phenotypes show differential microRNA expression in sputum. *Journal of Allergy and Clinical*  
343 *Immunology*. 2016;137(5):1433-46.
- 344 4. Müller L, Brighton LE, Carson JL, Fischer WA. Culturing of human nasal epithelial cells at the  
345 air liquid interface. *Journal of visualized experiments: JoVE*. 2013(80).
- 346 5. Dixon AE, Sugar EA, Zinreich SJ, Slavin RG, Corren J, Naclerio RM, et al. Criteria to screen for  
347 chronic sinonasal disease. *CHEST Journal*. 2009;136(5):1324-32.
- 348 6. Wu R, Smith D. Continuous multiplication of rabbit tracheal epithelial cells in a defined,  
349 hormone-supplemented medium. *In vitro*. 1982;18(9):800-12.
- 350 7. Alcorn JF, Guala AS, van der Velden J, McElhinney B, Irvin CG, Davis RJ, et al. Jun N-terminal  
351 kinase 1 regulates epithelial-to-mesenchymal transition induced by TGF- $\beta$ 1. *Journal of cell science*.  
352 2008;121(7):1036-45.
- 353 8. Van Tassell BW, Varma A, Salloum FN, Das A, Seropian IM, Toldo S, et al. Interleukin-1 trap  
354 attenuates cardiac remodeling after experimental acute myocardial infarction in mice. *Journal of*  
355 *cardiovascular pharmacology*. 2010;55(2):117-22.
- 356 9. Tomioka S, Bates JH, Irvin CG. Airway and tissue mechanics in a murine model of asthma:  
357 alveolar capsule vs. forced oscillations. *Journal of Applied Physiology*. 2002;93(1):263-70.
- 358 10. Riesenfeld E, Allen GB, Bates JH, Poynter ME, Wu M, Aimiand S, et al. The temporal  
359 evolution of airways hyperresponsiveness and inflammation. *Journal of allergy & therapy*.  
360 2012;1(5):1.
- 361 11. Tully JE, Hoffman SM, Lahue KG, Nolin JD, Anathy V, Lundblad LK, et al. Epithelial NF- $\kappa$ B  
362 orchestrates house dust mite-induced airway inflammation, hyperresponsiveness, and fibrotic  
363 remodeling. *The Journal of Immunology*. 2013;191(12):5811-21.
- 364 12. Anathy V, Aesif SW, Hoffman SM, Bement JL, Guala AS, Lahue KG, et al. Glutaredoxin-1  
365 attenuates S-glutathionylation of the death receptor fas and decreases resolution of *Pseudomonas*  
366 *aeruginosa* pneumonia. *American journal of respiratory and critical care medicine*. 2014;189(4):463-  
367 74.

368

**Table E1.** Demographic, functional, and inflammatory characteristics of the study cohort

|                               | Healthy subjects | Asthmatic patients | <i>P</i> value |
|-------------------------------|------------------|--------------------|----------------|
| n                             | 20               | 94                 |                |
| Age (yr)                      | 53 ± 3           | 52 ± 2             | 0.86           |
| BMI (kg/m <sup>2</sup> )      | 24.30 ± 1.05     | 27.28 ± 0.48       | 0.01           |
| Age asthma onset (range)      | -                | 41 (12-54)         | -              |
| Gender (M/F)                  | 10/10            | 43/51              | 0.3            |
| Atopy*, no. (%)               | 4 (20)           | 42 (45)            | 0.03           |
| Positive Dpt*, no. (% atopy)  | 3 (75)           | 25 (60)            |                |
| FEV1 % predicted              | 101 ± 4.62       | 81.56 ± 2.07       | 0.0001         |
| FEV1/FVC ratio                | 77.68 ± 2.51     | 72.41 ± 1.13       | 0.0291         |
| FENO (ppb), median (IQR)      | 20 (17.3-26.8)   | 17.5 (10-36.25)    | 0.13           |
| Eosinophils (%), median (IQR) | 0.2 (0-0.9)      | 0.9 (0.2-5.45)     | 0.03           |
| <b>Medication use</b>         |                  |                    |                |
| Not treated                   | -                | 5 (5)              | -              |
| ICS/LABA, no. (%)             | -                | 58 (62)            | -              |
| eq Beclomethasone µg/ml       | -                | 1000 (400-2000)    |                |
| ICS alone, no. (%)            | -                | 2 (2)              | -              |
| OCS, no. (%)                  | -                | 3 (3)              | -              |
| SABA, no. (%)                 | -                | 64 (68)            | -              |
| SABA only, no. (%)            | -                | 19 (20)            | -              |
| LTRA, no. (%)                 | -                | 24 (26)            | -              |

Data are expressed as means ± SDs, or medians with interquartile range (IQR). *P* values are based on the student's *t* test (mean ± SD), the  $\chi^2$  test for proportions (sex), the Wilcoxon rank sum test (median [range]), or Poisson regression (atopy). Atopy is defined as positive test results for at least 1 specific IgE to common aeroallergens. FENO: Fraction of exhaled nitric oxide. \* Dpt.: Dermatophagoid pteronyssinus. ICS: inhaled corticosteroid. LABA: long acting beta agonist. OCS: oral corticosteroids. SABA: Short acting beta agonist. LTRA: leukotriene receptor agonists. Ethnicity: All subjects are Caucasian except for 2 African subjects.

**Table E2.** Demographic, functional, and inflammatory characteristics of the study cohort enrolled at the University of Vermont Medical Center

|                          | Healthy subjects | Asthmatic patients |
|--------------------------|------------------|--------------------|
| n                        | 7                | 6                  |
| Age (range)              | 23 (19-27)       | 23 (19-45)         |
| Gender (M/F)             | 0/6              | 3/4                |
| Age asthma onset (range) | -                | 4 (1-18)           |
| BMI                      | 23.2 (19.8-26.3) | 28.6 (22.0-35.0)   |
| Atopy*, no. (%)          | -                | 7 (100)            |
| <b>Medication use</b>    |                  |                    |
| ICS_LABA                 | -                | 3                  |
| ICS                      | -                | 3                  |
| SABA only                | -                | 1                  |
| SNQ                      | 0.4 (0-0.8)      | 1.4 (1.2-1.6)      |

Data are expressed as median (range). ICS\_LABA: inhaled corticosteroid\_long acting beta agonist. ICS: inhaled corticosteroid. SABA: short acting beta agonist. SNQ: sinonasal questionnaire. \*All participants were allergic to house dust mite as determined either by positive skin prick test to *D. pteronyssinus* or positive serum IgE to *D. pteronyssinus*. All subject are Caucasian.

**Table E3. The primers used in this study**

| <b>Genes</b>  | <b>Forward</b>              | <b>Reverse</b>              |
|---------------|-----------------------------|-----------------------------|
| <i>Mct4</i>   | 5'-ATCGTGGGCACTCAGAAGTT-3'  | 5'-CGCCAGGATGAACACATACTT-3' |
| <i>Pfkl</i>   | 5'-CATATATGTGGGGGCCAAAG-3'  | 5'-GACACACAGGTTGGTGATGC-3'  |
| <i>Hk2</i>    | 5'-GGGACGACGGTACACTCAAT-3'  | 5'-GCCAGTGGTAAGGAGCTCTG-3'  |
| <i>Glut1</i>  | 5'-TCTCTGTCCGGCCTCTTTGTT-3' | 5'-CCAGTTTGGAGAAGCCATA-3'   |
| <i>Glut2</i>  | 5'-GCCTGTGTATGCAACCATTG-3'  | 5'-GAAGATGGCAGTCATGCTCA-3'  |
| <i>Glut3</i>  | 5'-TGTCACAGGAGAAGCAGGTG-3'  | 5'-GCTCCAATCGTGGCATAGAT-3'  |
| <i>Pkm2</i>   | 5'-CTGCAGGTGAAGGAGAAAGG-3'  | AGATGCAAACACCATGTCCA-3'     |
| <i>Ldha</i>   | 5'-GGAAGGAGGTTCAAGCAG-3'    | 5'-ACCCGCCTAAGGTTCTTCAT-3'  |
| <i>Pgm1</i>   | 5'-TCAGGCCATTGAGGAAAATC-3'  | 5'-CGAACTTACCTTGCTCTCC-3'   |
| <i>Pdk1</i>   | 5'-GGCGGCTTTGTGATTTGTAT-3'  | 5'-ACCTGAATCGGGGGATAAAC-3'  |
| <i>Tpi1</i>   | 5'-CCTGGCCTATGAACCTGTGT-3'  | 5'-CAGGTTGCTCCAGTCACAGA-3'  |
| <i>Eno1</i>   | 5'-CTGCCTCCGAGTTCTACAGG-3'  | 5'-CGCTTAGGGTTGGTCACTGT-3'  |
| <i>Pgk1</i>   | 5'-CAAGGCTTTGGAGAGTCCAG-3'  | 5'-TGTGCCAATCTCCATGTTGT-3'  |
| <i>Gpi</i>    | 5'-GTGGTCAGCCATTGGACTTT-3'  | 5'-CTGGAAATAGGCAGCAAAGC-3'  |
| <i>Pfkfb3</i> | 5'-CAGCTACCAGCCTCTTGACC-3'  | 5'-AACTTCTGCCTCTGCTGGA-3'   |
| <i>Mct1</i>   | 5'-TCCAGTAATGATCGCTGGTG-3'  | 5'-AGTTGAAAGCAAGCCCAAGA-3'  |
| <i>Ikake</i>  | 5'-CTGGATGTCCCAAAGTTCGT-3'  | 5'-AGGCTGCTGCTGAGGTAGAG-3'  |

# Figure E1

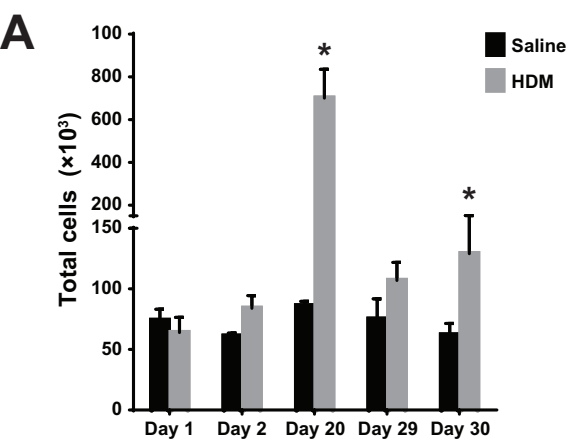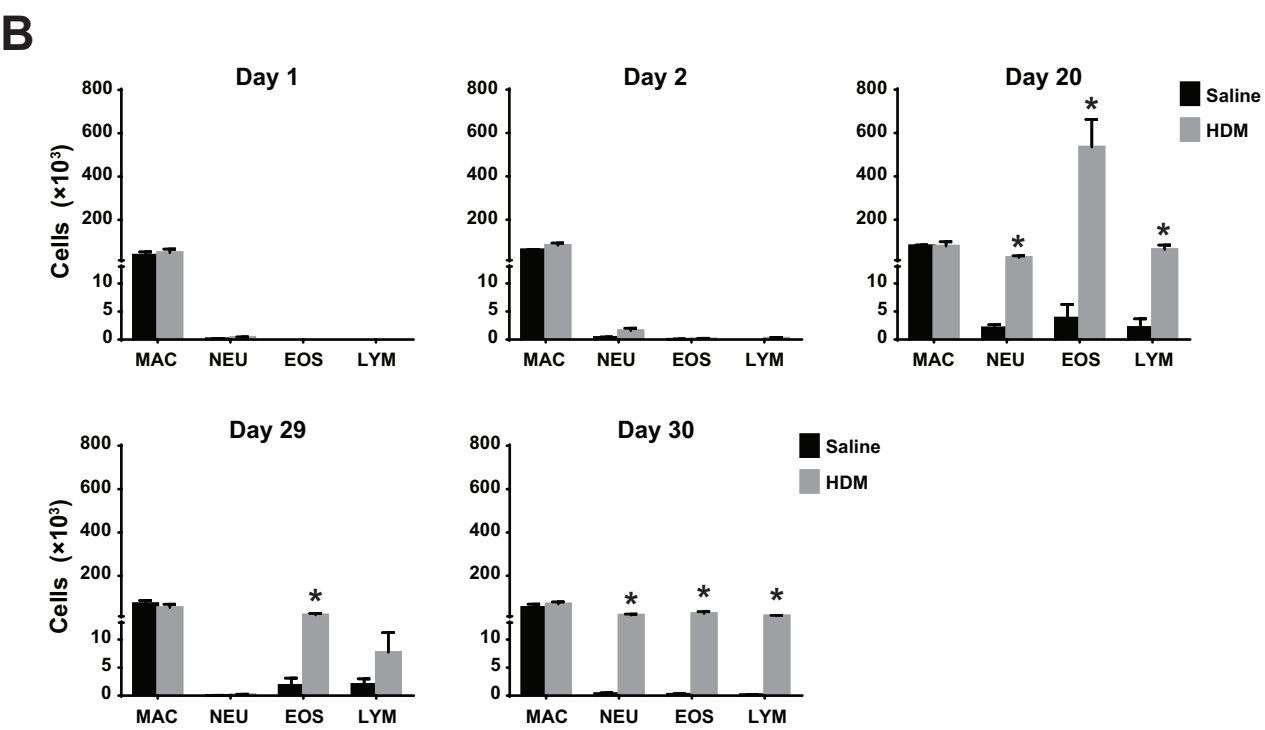

Figure E2

A

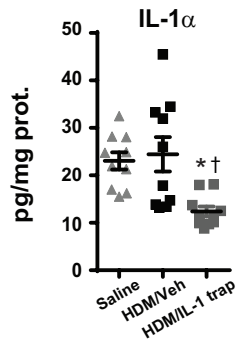

B

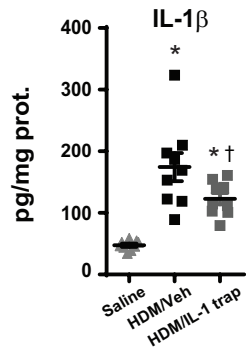



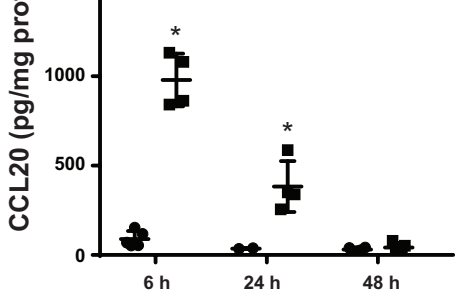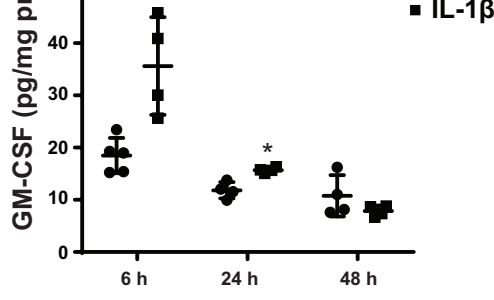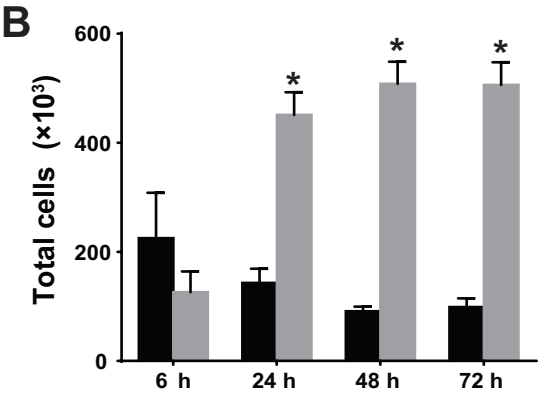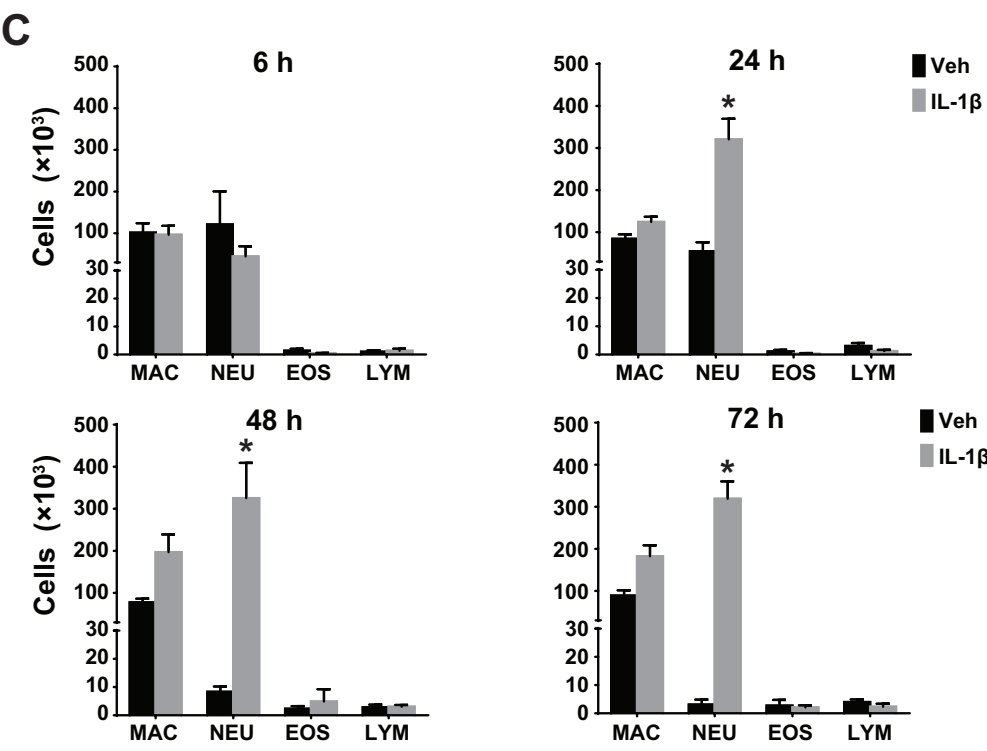

Figure E4

A

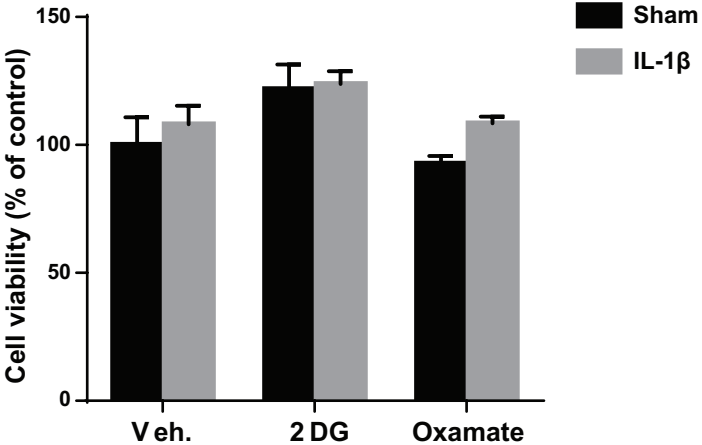

B

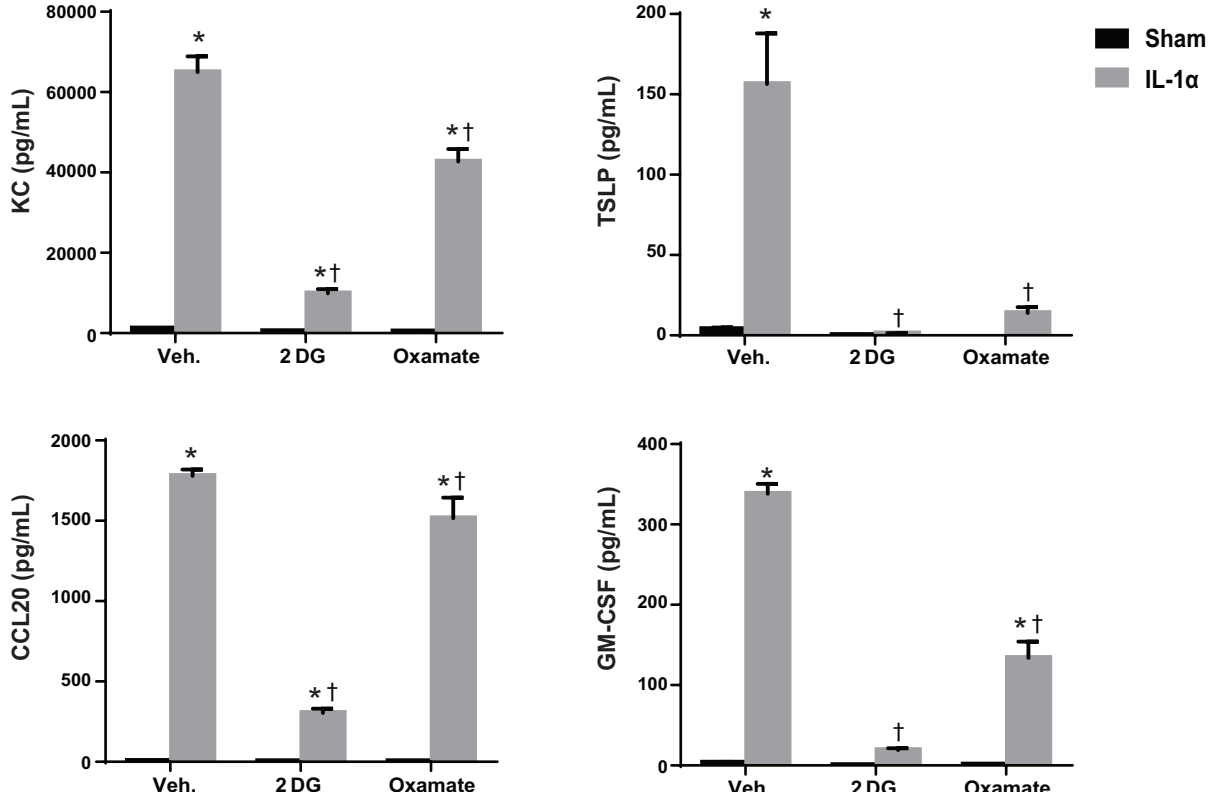

Figure E5

A

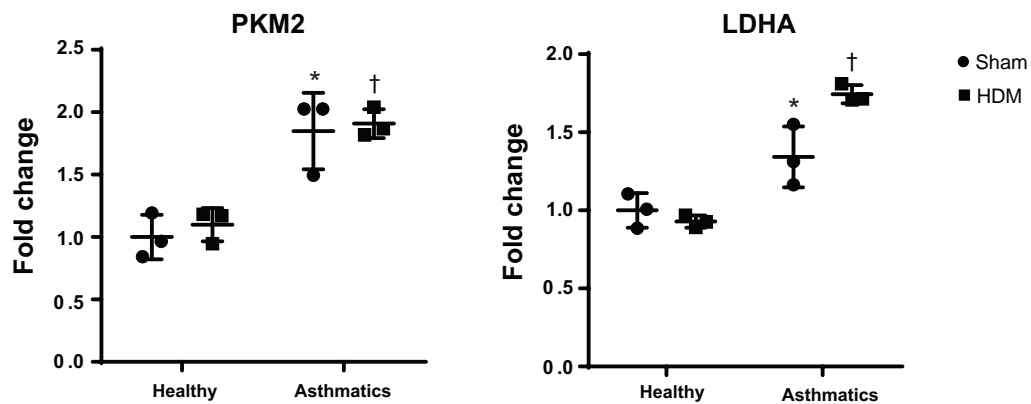

B

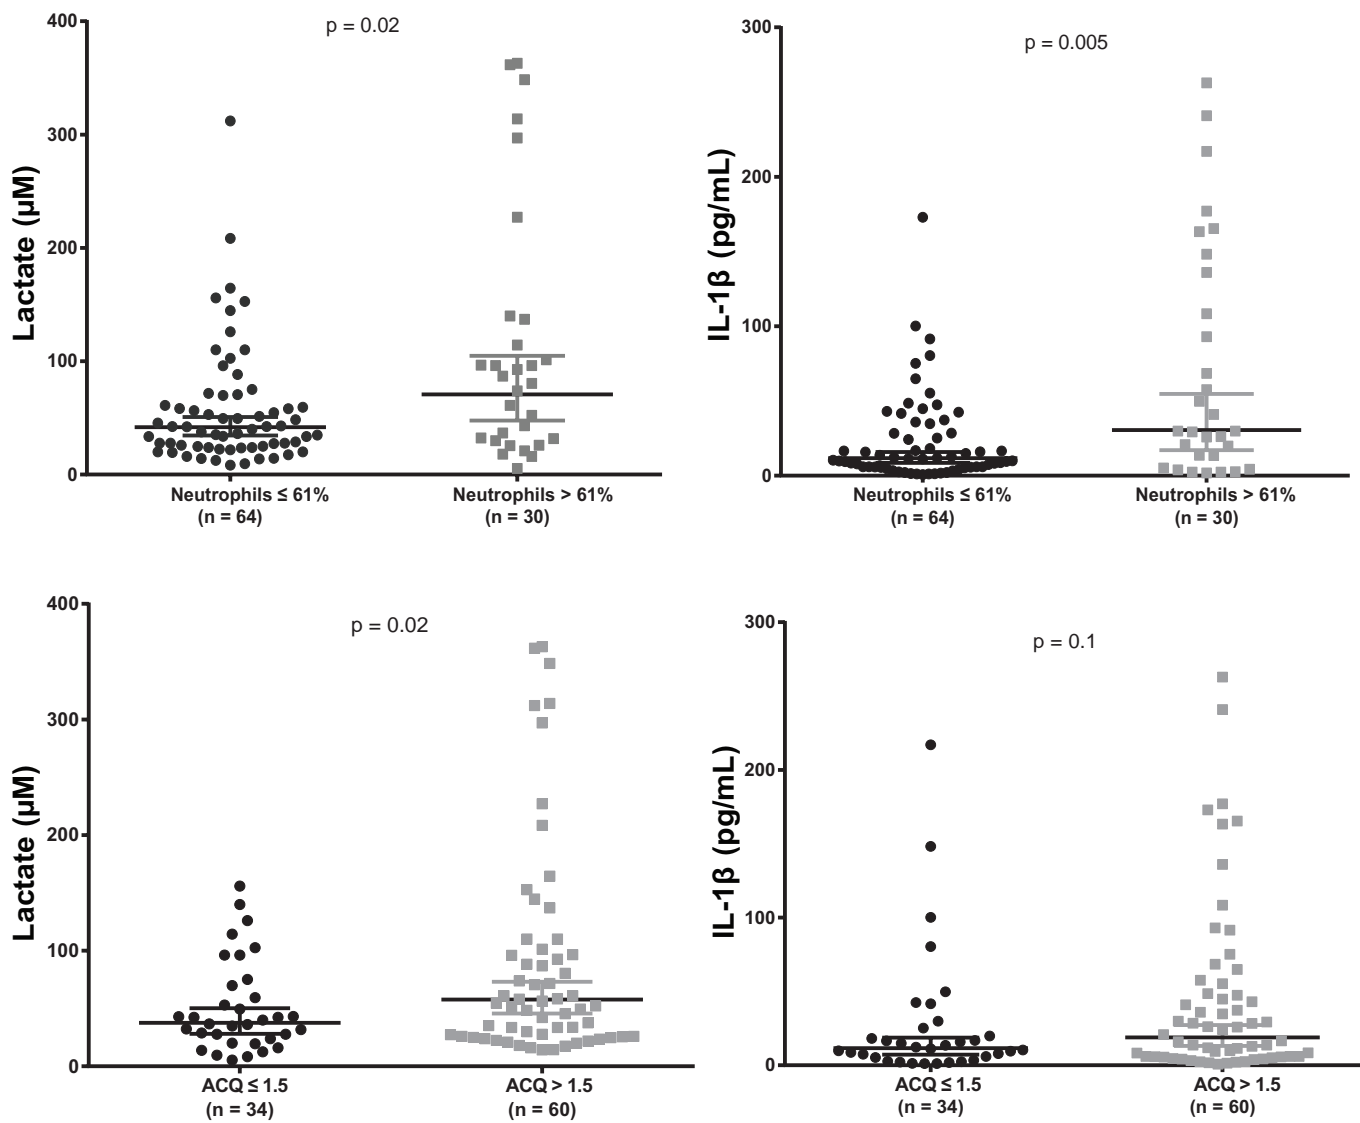

Supplement: NIHMS917986-supplement-1.pdf [file NIHMS917986-supplement-1.pdf]
